# Supplementary material for: Isolation, Identification and Evaluation of the Effects of Native Entomopathogenic Fungi from Côte d’Ivoire on Galleria mellonella
Source: MDPI journal article supplement (doi:10.3390/microorganisms11082104), 2023-08-18
Supplement: s1 [file s1]

Table S3: Fungal isolates obtained by the baiting method

|    | <b>Fungi</b>                   | <b>Isolates codes</b> | <b>Localities</b> | <b>Sampled localities coordinates</b> |
|----|--------------------------------|-----------------------|-------------------|---------------------------------------|
| 1  | <i>Beauveria bassiana</i>      | A211                  | Agnibilékrou      | 7°7.8678'N,3°12.249'W                 |
| 2  | <i>Beauveria bassiana</i>      | A214a                 | Agnibilékrou      | 7°7.8678'N,3°12.249'W                 |
| 3  | <i>Beauveria bassiana</i>      | A214b                 | Agnibilékrou      | 7°7.8678'N,3°12.249'W                 |
| 4  | <i>Penicillium</i> sp.         | A131                  | Agnibilékrou      | 7°7.8678'N,3°12.249'W                 |
| 5  | <i>Penicillium expansum</i>    | A321                  | Agnibilékrou      | 7°7.8678'N,3°12.249'W                 |
| 6  | <i>Aspergillus terreus</i>     | A324                  | Agnibilékrou      | 7°7.8678'N,3°12.249'W                 |
| 7  | <i>Neocosmospora solani</i>    | A34                   | Agnibilékrou      | 7°7.8678'N,3°12.249'W                 |
| 8  | <i>Trichoderma harzianum</i>   | A331                  | Agnibilékrou      | 7°7.8678'N,3°12.249'W                 |
| 9  | <i>Talaromyces amestolkiae</i> | A213                  | Agnibilékrou      | 7°7.8678'N,3°12.249'W                 |
| 10 | <i>Talaromyces</i> sp.         | A212                  | Agnibilékrou      | 7°7.8678'N,3°12.249'W                 |
| 11 | <i>Penicillium</i> sp.         | A242                  | Agnibilékrou      | 7°7.8678'N,3°12.249'W                 |
| 12 | <i>Rhizopus arrhizus</i>       | A122                  | Agnibilékrou      | 7°7.8678'N,3°12.249'W                 |
| 13 | <i>Fusarium</i> sp.            | A323                  | Agnibilékrou      | 7°7.8678'N,3°12.249'W                 |
| 14 | <i>Aspergillus terreus</i>     | A325                  | Agnibilékrou      | 7°7.8678'N,3°12.249'W                 |
| 15 | <i>Neocosmospora solani</i>    | A311                  | Agnibilékrou      | 7°7.8678'N,3°12.249'W                 |
| 16 | <i>Neocosmospora solani</i>    | A241                  | Agnibilékrou      | 7°7.8678'N,3°12.249'W                 |
| 17 | <i>Neocosmospora solani</i>    | A332                  | Agnibilékrou      | 7°7.8678'N,3°12.249'W                 |
| 18 | <i>Fusarium oxysporum</i>      | A322                  | Agnibilékrou      | 7°7.8678'N,3°12.249'W                 |
| 19 | <i>Fusarium</i> sp.            | A121                  | Agnibilékrou      | 7°7.8678'N,3°12.249'W                 |
| 20 | <i>Fusarium</i> sp.            | Fe25                  | Ferkessedougou    | 9° 35' 37" N, 5° 11' 50"W             |
| 21 | <i>Neocosmospora solani</i>    | Fe332                 | Ferkessedougou    | 9° 35' 37" N, 5° 11' 50"W             |
| 22 | <i>Neocosmospora solani</i>    | Fe11                  | Ferkessedougou    | 9° 35' 37" N, 5° 11' 50"W             |
| 23 | <i>Fusarium oxysporum</i>      | Fe152                 | Ferkessedougou    | 9° 35' 37" N, 5° 11' 50"W             |
| 24 | <i>Fusarium oxysporum</i>      | Fe331                 | Ferkessedougou    | 9° 35' 37" N, 5° 11' 50"W             |
| 25 | <i>Fusarium</i> sp.            | Fe23                  | Ferkessedougou    | 9° 35' 37" N, 5° 11' 50"W             |
| 26 | <i>Fusarium</i> sp.            | Fe321                 | Ferkessedougou    | 9° 35' 37" N, 5° 11' 50"W             |

|    |                               |       |                |                             |
|----|-------------------------------|-------|----------------|-----------------------------|
| 27 | <i>Fusarium oxysporum</i>     | Fe12  | Ferkessedougou | 9° 35' 37" N, 5° 11' 50"W   |
| 28 | <i>Neocosmospora solani</i>   | G151  | Gagnoa         | 6° 08' 00"N, 5° 56' 00"W    |
| 29 | <i>Neocosmospora solani</i>   | G35   | Gagnoa         | 6° 08' 00"N, 5° 56' 00"W    |
| 30 | <i>Neocosmospora solani</i>   | G332  | Gagnoa         | 6° 08' 00"N, 5° 56' 00"W    |
| 31 | <i>Fusarium oxysporum</i>     | G152  | Gagnoa         | 6° 08' 00"N, 5° 56' 00"W    |
| 32 | <i>Fusarium oxysporum</i>     | G331  | Gagnoa         | 6° 08' 00"N, 5° 56' 00"W    |
| 33 | <i>Fusarium oxysporum</i>     | G132  | Gagnoa         | 6° 08' 00"N, 5° 56' 00"W    |
| 34 | <i>Fusarium</i> sp.           | G212  | Gagnoa         | 6° 08' 00"N, 5° 56' 00"W    |
| 35 | <i>Fusarium</i> sp.           | Ko211 | Korhogo        | 9°25'0.0012"N,5°37'0.0012"W |
| 36 | <i>Neocosmospora solani</i>   | Ko111 | Korhogo        | 9°25'0.0012"N,5°37'0.0012"W |
| 37 | <i>Neocosmospora solani</i>   | Ko223 | Korhogo        | 9°25'0.0012"N,5°37'0.0012"W |
| 38 | <i>Fusarium oxysporum</i>     | Ko142 | Korhogo        | 9°25'0.0012"N,5°37'0.0012"W |
| 39 | <i>Fusarium oxysporum</i>     | Ko114 | Korhogo        | 9°25'0.0012"N,5°37'0.0012"W |
| 40 | <i>Metarhizium</i> sp.        | T34   | Tiassalé       | 5°53'54.20"N,4°49'22.55"W   |
| 41 | <i>Metarhizium</i> sp.        | T121  | Tiassalé       | 5°53'54.20"N,4°49'22.55"W   |
| 42 | <i>Metarhizium</i> sp.        | T132  | Tiassalé       | 5°53'54.20"N,4°49'22.55"W   |
| 43 | <i>Metarhizium</i> sp.        | T141  | Tiassalé       | 5°53'54.20"N,4°49'22.55"W   |
| 44 | <i>Metarhizium</i> sp.        | T313  | Tiassalé       | 5°53'54.20"N,4°49'22.55"W   |
| 45 | <i>Metarhizium anisopliae</i> | T35   | Tiassalé       | 5°53'54.20"N,4°49'22.55"W   |
| 46 | <i>Metarhizium anisopliae</i> | T331  | Tiassalé       | 5°53'54.20"N,4°49'22.55"W   |
| 47 | <i>Fusarium oxysporum</i>     | T113  | Tiassalé       | 5°53'54.20"N,4°49'22.55"W   |
| 48 | <i>Fusarium oxysporum</i>     | T342  | Tiassalé       | 5°53'54.20"N,4°49'22.55"W   |
| 49 | <i>Neocosmospora solani</i>   | T25   | Tiassalé       | 5°53'54.20"N,4°49'22.55"W   |
| 50 | <i>Neocosmospora solani</i>   | T112  | Tiassalé       | 5°53'54.20"N,4°49'22.55"W   |
| 51 | <i>Neocosmospora solani</i>   | T15   | Tiassalé       | 5°53'54.20"N,4°49'22.55"W   |
| 52 | <i>Trichoderma harzianum</i>  | T213  | Tiassalé       | 5°53'54.20"N,4°49'22.55"W   |
| 53 | <i>Mortierella</i> sp.        | T221  | Tiassalé       | 5°53'54.20"N,4°49'22.55"W   |
| 54 | <i>Fusarium oxysporum</i>     | Ou222 | Ouangolodougou | 9°58'0" N, 5°9'0" W         |
| 55 | <i>Neocosmospora solani</i>   | Ou212 | Ouangolodougou | 9°58'0" N, 5°9'0" W         |
| 56 | <i>Fusarium</i> sp.           | Ou241 | Ouangolodougou | 9°58'0" N, 5°9'0" W         |

|    |                     |       |                                    |
|----|---------------------|-------|------------------------------------|
| 57 | <i>Fusarium</i> sp. | Ou143 | Ouangelodougou 9°58'0" N, 5°9'0" W |
| 58 | <i>Fusarium</i> sp. | Ou242 | Ouangelodougou 9°58'0" N, 5°9'0" W |
| 59 | <i>Fusarium</i> sp. | Ou232 | Ouangelodougou 9°58'0" N, 5°9'0" W |
