# Supplementary material for: Isolation, Identification and Evaluation of the Effects of Native Entomopathogenic Fungi from Côte d’Ivoire on Galleria mellonella
Source: MDPI journal article supplement (doi:10.3390/microorganisms11082104), 2023-08-18
Supplement: s1 [file s1]

Table S2: Fungal isolates obtained by the dilution method

|    | <b>Fungi</b>                       | <b>Isolates codes</b> | <b>Localities</b> | <b>Sampled localities coordinates</b> |
|----|------------------------------------|-----------------------|-------------------|---------------------------------------|
| 1  | <i>Pseudothielavia arxii</i>       | Ag1                   | Agnibilékrou      | 7°7.8678'N,3°12.249'W                 |
| 2  | <i>Mycoaciella</i> sp.             | Ag2                   | Agnibilékrou      | 7°7.8678'N,3°12.249'W                 |
| 3  | <i>Chaetomium arcuatum</i>         | Ag3                   | Agnibilékrou      | 7°7.8678'N,3°12.249'W                 |
| 4  | <i>Aspergillus</i> sp.             | Ag4                   | Agnibilékrou      | 7°7.8678'N,3°12.249'W                 |
| 5  | <i>Pseudothielavia arxii</i>       | Ag5                   | Agnibilékrou      | 7°7.8678'N,3°12.249'W                 |
| 6  | <i>Neocosmospora solani</i>        | Agi1                  | Agnibilékrou      | 7°7.8678'N,3°12.249'W                 |
| 7  | <i>Neocosmospora solani</i>        | Agi2                  | Agnibilékrou      | 7°7.8678'N,3°12.249'W                 |
| 8  | <i>Mucor irregularis</i>           | Agi3                  | Agnibilékrou      | 7°7.8678'N,3°12.249'W                 |
| 9  | <i>Neocosmospora solani</i>        | Agi4                  | Agnibilékrou      | 7°7.8678'N,3°12.249'W                 |
| 10 | <i>Mucor irregularis</i>           | Agi5                  | Agnibilékrou      | 7°7.8678'N,3°12.249'W                 |
| 11 | <i>Mucor irregularis</i>           | Agi6                  | Agnibilékrou      | 7°7.8678'N,3°12.249'W                 |
| 12 | <i>Chaetomium arcuatum</i>         | Fe3                   | Ferkessedougou    | 9° 35' 37" N, 5° 11' 50"W             |
| 13 | <i>Fusarium equiseti</i>           | Fei4                  | Ferkessedougou    | 9° 35' 37" N, 5° 11' 50"W             |
| 14 | <i>Talaromyces</i> sp.             | Ga3                   | Gagnoa            | 6° 08' 00"N, 5° 56' 00"W              |
| 15 | <i>Penicillium</i> sp.             | Ga4                   | Gagnoa            | 6° 08' 00"N, 5° 56' 00"W              |
| 16 | <i>Curvularia</i> sp.              | Ga7                   | Gagnoa            | 6° 08' 00"N, 5° 56' 00"W              |
| 17 | <i>Mucor indicus</i>               | Ko1                   | Korhogo           | 9°25'0.0012"N,5°37'0.0012"W           |
| 18 | <i>Trametes polyzona</i>           | Ko2                   | Korhogo           | 9°25'0.0012"N,5°37'0.0012"W           |
| 19 | <i>Trichoderma longibrachiatum</i> | Ko4                   | Korhogo           | 9°25'0.0012"N,5°37'0.0012"W           |
| 20 | <i>Pseudothielavia arxii</i>       | Ou1                   | Ouangolodougou    | 9°58'0" N, 5°9'0" W                   |
| 21 | <i>Rhizopus homothallicus</i>      | Ou2                   | Ouangolodougou    | 9°58'0" N, 5°9'0" W                   |
| 22 | <i>Pseudothielavia arxii</i>       | Ou3                   | Ouangolodougou    | 9°58'0" N, 5°9'0" W                   |
| 23 | <i>Pseudothielavia arxii</i>       | Ou4                   | Ouangolodougou    | 9°58'0" N, 5°9'0" W                   |
| 24 | <i>Trichoderma asperellum</i>      | Ou5                   | Ouangolodougou    | 9°58'0" N, 5°9'0" W                   |
| 25 | <i>Curvularia</i> sp.              | T1                    | Tiassalé          | 5°53'54.20"N,4°49'22.55"W             |
| 26 | <i>Paraengyodontium album</i>      | T2                    | Tiassalé          | 5°53'54.20"N,4°49'22.55"W             |
| 27 | <i>Neocosmospora solani</i>        | T3                    | Tiassalé          | 5°53'54.20"N,4°49'22.55"W             |
