# Supplementary material for: Isolation, Identification and Evaluation of the Effects of Native Entomopathogenic Fungi from Côte d’Ivoire on Galleria mellonella
Source: MDPI journal article supplement (doi:10.3390/microorganisms11082104), 2023-08-18
Supplement: s1 [file s1]

Table S4. Genetic identifications of isolates from both methods

| Fungi                              | Isolates | Accessions numbers | Sampled localities<br>coordinates |
|------------------------------------|----------|--------------------|-----------------------------------|
| <i>Aspergillus</i> sp.             | Ag4      | ON121942           | Agnibilékrou                      |
| <i>Aspergillus terreus</i>         | A324     | ON121966           | Agnibilékrou                      |
| <i>Beauveria bassiana</i>          | A211     | ON121958           | Agnibilékrou                      |
| <i>Beauveria bassiana</i>          | A214a    | ON121959           | Agnibilékrou                      |
| <i>Beauveria bassiana</i>          | A214b    | ON121960           | Agnibilékrou                      |
| <i>Chaetomium arcuatum</i>         | Ag3      | ON121941           | Agnibilékrou                      |
| <i>Curvularia</i> sp.              | Ga7      | ON121951           | Gagnoa                            |
| <i>Fusarium equiseti</i>           | Fei4     | ON121948           | Ferkessedougou                    |
| <i>Neocosmospora solani</i>        | Agi1     | ON121944           | Agnibilékrou                      |
| <i>Neocosmospora solani</i>        | Agi2     | ON121945           | Agnibilékrou                      |
| <i>Neocosmospora solani</i>        | Agi4     | ON121946           | Agnibilékrou                      |
| <i>Neocosmospora solani</i>        | A34      | ON121973           | Agnibilékrou                      |
| <i>Neocosmospora solani</i>        | G35      | ON121974           | Gagnoa                            |
| <i>Neocosmospora solani</i>        | G151     | ON121975           | Gagnoa                            |
| <i>Neocosmospora solani</i>        | T15      | ON121976           | Tiassalé                          |
| <i>Neocosmospora solani</i>        | T25      | ON121977           | Tiassalé                          |
| <i>Neocosmospora solani</i>        | T112     | ON121978           | Tiassalé                          |
| <i>Fusarium oxysporum</i>          | G132     | ON121979           | Gagnoa                            |
| <i>Fusarium oxysporum</i>          | T342     | ON121980           | Tiassalé                          |
| <i>Fusarium oxysporum</i>          | T113     | ON121981           | Tiassalé                          |
| <i>Fusarium</i> sp.                | A323     | ON121982           | Agnibilékrou                      |
| <i>Fusarium</i> sp.                | G212     | ON121983           | Gagnoa                            |
| <i>Metarhizium anisopliae</i>      | T35      | ON121962           | Tiassalé                          |
| <i>Metarhizium anisopliae</i>      | T331     | ON121963           | Tiassalé                          |
| <i>Metarhizium</i> sp.             | T141     | ON121961           | Tiassalé                          |
| <i>Mortierella</i> sp.             | T221     | ON121967           | Tiassalé                          |
| <i>Mucor indicus</i>               | Ko1      | ON121952           | Korhogo                           |
| <i>Mucor irregularis</i>           | Agi6     | ON121947           | Agnibilékrou                      |
| <i>Penicillium expansum</i>        | A321     | ON121971           | Agnibilékrou                      |
| <i>Penicillium</i> sp.             | A242     | ON121970           | Agnibilékrou                      |
| <i>Penicillium</i> sp.             | A131     | ON121972           | Agnibilékrou                      |
| <i>Penicillium</i> sp.             | Ga4      | ON121950           | Gagnoa                            |
| <i>Pseudothielavia arxii</i>       | Ag1      | ON121940           | Agnibilékrou                      |
| <i>Pseudothielavia arxii</i>       | Ag5      | ON121943           | Agnibilékrou                      |
| <i>Rhizopus arrhizus</i>           | A122     | ON121965           | Agnibilékrou                      |
| <i>Rhizopus homothallicus</i>      | Ou2      | ON121955           | Ouangelodougou                    |
| <i>Talaromyces amestolkiae</i>     | A213     | ON121969           | Agnibilékrou                      |
| <i>Talaromyces</i> sp.             | A212     | ON121968           | Agnibilékrou                      |
| <i>Talaromyces</i> sp.             | Ga3      | ON121949           | Gagnoa                            |
| <i>Trametes polyzona</i>           | Ko2      | ON121953           | Korhogo                           |
| <i>Pseudothielavia arxii</i>       | Ou3      | ON121956           | Ouangelodougou                    |
| <i>Trichoderma harzianum</i>       | A331     | ON121964           | Agnibilékrou                      |
| <i>Trichoderma asperellum</i>      | Ou5      | ON121957           | Ouangelodougou                    |
| <i>Trichoderma longibrachiatum</i> | Ko4      | ON121954           | Korhogo                           |
