# Supplementary material for: Isolation, Identification and Evaluation of the Effects of Native Entomopathogenic Fungi from Côte d’Ivoire on Galleria mellonella
Source: MDPI journal article supplement (doi:10.3390/microorganisms11082104), 2023-08-18
Supplement: s1 [file s1]

Table S1: Sampled localities, GPS coordinates and samples constitution.

| Regions                            |                          |                      |                                  |                            |                            |
|------------------------------------|--------------------------|----------------------|----------------------------------|----------------------------|----------------------------|
| North                              |                          |                      | South                            |                            | East                       |
| Localities                         |                          |                      |                                  |                            |                            |
| Korhogo                            | Ferkessedougou           | Ouangolodougou       | Tiassalé                         | Gagnoa                     | Agnibilékrou               |
| 9° 25' 0.0012" N, 5° 37' 0.0012" W | 9° 35' 37" N, 5° 11' 50" | 9° 58 '0" N, 5°9 '0" | 5° 53' 54.20" N, 4° 49' 22.55" W | 6° 08' 00" N, 5° 56' 00" W | 7° 7.8678' N, 3° 12.249' W |
| Field 1                            | Field1                   | Field1               | Field1                           | Field1                     | Field1                     |
| Field2                             | Field2                   | Field2               | Field2                           | Field2                     | Field2                     |
| Field3                             | Field3                   | Field3               | Field3                           | Field3                     | Field3                     |
| Field4                             | Field4                   | Field4               | Field4                           | Field4                     | Field4                     |
| Field5                             | Field5                   | Field5               | Field5                           | Field5                     | Field5                     |
| Composite sample 1                 | Composite sample 2       | Composite sample 3   | Composite sample 4               | Composite sample 5         | Composite sample 6         |
